# Supplementary material
Source: Springer Nature journal article supplement (https://www.springermedizin.de/resource/supplementary/12943_2014_1285_MOESM4_ESM.pdf/9553146)
Supplement: MOESM4 [file 9553146]

Additional file 4

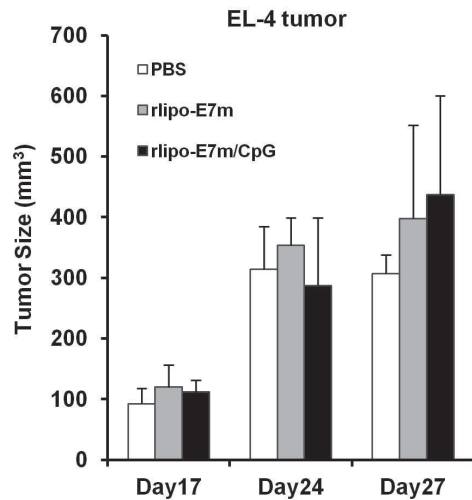

**Figure S4: ripo-E7m- and CpG ODN-mediated therapeutic effects are abolished in thymoma tumor-bearing mice.** A total of  $5 \times 10^4$  EL4 tumor cells were subcutaneously (*s.c.*) implanted into C57BL/6 ( $n=5$  per group) mice. Seven days after tumor cell implantation, the tumor-bearing mice were administered a single dose of PBS, ripo-E7m or ripo-E7m + CpG via *s.c.* injection. The data represent the mean tumor volume at 17, 24 and 27 days after tumor cell implantation (means + SD). All the tumor sizes were measured using electronic calipers and calculated using the formula length  $\times$  width  $\times$  width / 2 (mm<sup>3</sup>).
